# Supplementary material
Source: PubMed Central journal article supplement (PMC8191023)
Supplement: 12879_2021_6233_MOESM4_ESM.pdf [file 12879_2021_6233_MOESM4_ESM.pdf]

SUBJECT ID#: P126-S00-

*This form is completed via interview with the subject at SCREENING and reviewed at BASELINE.*

**Demographics**

Age: \_\_\_\_\_

Sex:  Male  Female

Birth date: \_\_\_\_ / \_\_\_\_ / \_\_\_\_ (dd/MMM/yyyy)

Ethnicity:  Hispanic or Latino  Not reported  
 Not Hispanic or Latino  Unknown

*Indicate No or Yes for each race listed below. Yes may be checked for more than one race. If a subject refuses to identify his or her race, check No to all options.*

American Indian or Alaskan Native:  Yes  No

Asian:  Yes  No

Native Hawaiian or other Pacific Islander:  Yes  No

Black or African American:  Yes  No

White:  Yes  No

Occupation: \_\_\_\_\_

**Vaccination History & Other COVID-19 Studies Enrollment Status**

\*Yes  No

Have you received any vaccines in the past month?

If \*Yes, list vaccines: \_\_\_\_\_

COVID-19 vaccine or therapy trial enrollment status:

- Previously enrolled
- Currently enrolled
- Plan to enroll soon (i.e. in the next one or two months)
- N/A

| CRF ENTRY    | CRF QC       | DB ENTRY     | DB QC        |
|--------------|--------------|--------------|--------------|
| Initial/date | Initial/date | Initial/date | Initial/date |

SUBJECT ID#: P126-S00-

**Medical History - Comorbidities & Risk Factors**

**Asthma**    \*Yes    No

**If \*Yes:**    Well-controlled (defined as <2 days per week etc.)    Not well controlled

**Pulmonary Disease**    *Any other pulmonary disease (including emphysema, chronic bronchitis, and interstitial lung disease).*

Yes    No    Ongoing    Unknown

**Diabetes**    \*Yes    No

**If \*Yes:**

Insulin Requiring    Yes    No

Controlled    Well-controlled (HgbA1c<7% in the last 6 months)    Not well controlled

**Kidney Disease**    \*Yes    No

**If \*Yes:**

Severity    Mild (GFR <60)    Greater than mild

**Liver Disease**    *Any liver disease, including fatty liver disease, cirrhosis, or fibrosis.*

Yes    No    Ongoing    Unknown

**Cancer**    *Any type of cancer that is not in complete remission (e.g. excision of basal cell carcinoma, breast mass, benign cancerous lesions) due to total excision of lesion or no evidence of cancer for at least 5 years.*

Yes    No    Ongoing    Unknown

**Cardiovascular**    Do you have coronary artery disease?    Yes    No    Ongoing    Unknown

**Disease**    Have you ever had a heart attack?    Yes    No    Ongoing    Unknown

Do you have angina?    Yes    No    Ongoing    Unknown

Do you have valvular disease?    Yes    No    Ongoing    Unknown

Do you have an abnormal heart rhythm?    Yes    No    Ongoing    Unknown

Do you have a pacemaker?    Yes    No    Ongoing    Unknown

Any other cardiac disease?    \*Yes    No    Ongoing    Unknown

**If \*Yes,** \_\_\_\_\_

| CRF ENTRY    | CRF QC       | DB ENTRY     | DB QC        |
|--------------|--------------|--------------|--------------|
| Initial/date | Initial/date | Initial/date | Initial/date |

SUBJECT ID#: P126-S00-

**Heart Failure** \*Yes No

**If \*Yes:**

Severity *Ever diagnosed with greater than or equal to Class 2 heart failure (mild symptoms and slight limitations during normal activity).*

Yes No Ongoing Unknown

**Hypertension** \*Yes No

**If \*Yes:**

Severity *Ever diagnosed with Grade 2 (moderate) or 3 (severe) hypertension with blood pressure readings consistently greater than 160/100 mmHg even with the use of medications and lifestyle changes.*

Yes No Ongoing Unknown

**Immunocompromised State or Immune Modulating Medications** *Ever diagnosed with an immunocompromised state or use of immune modulating medications within the last 12 months.*

Yes No Ongoing Unknown

**Smoking (ever)** \*Yes No (never smoked)

**If \*Yes:**

Average number of packs per day:  Less than a pack a day **or more**, if more specify # of packs/day \_\_\_\_\_

Smoking, number of years: \_\_\_\_\_

Packs/Year history (average # packs per day times # of years smoked): \_\_\_\_\_

Currently smoking?

\*Yes \*No

**If \*No**, when did you stop: \_\_\_/\_\_\_/\_\_\_ (dd/MMM/yyyy)

**Vaping (ever)** \*Yes No

**If \*Yes:**

When did you start: \_\_\_/\_\_\_/\_\_\_ (dd/MMM/yyyy)

**Pregnancy** Are you pregnant?  
Yes No Unknown

**Children** Do you have any children?

\*Yes No

**If \*Yes**, how many: \_\_\_\_\_

**What is the age of each child living in your household?**

Child 1: \_\_\_ Child 2: \_\_\_ Child 3: \_\_\_ Child 4: \_\_\_ Child 5: \_\_\_ Child 6: \_\_\_ Child 7: \_\_\_

**Number of People** How many people are living in your household, including yourself? \_\_\_\_\_

| CRF ENTRY    | CRF QC       | DB ENTRY     | DB QC        |
|--------------|--------------|--------------|--------------|
| Initial/date | Initial/date | Initial/date | Initial/date |

SUBJECT ID#: P126-S00-

**Medical History - Comorbidities & Risk Factors - CONTINUED**

|                                                                                                                                                                                         |                                                                                                                                         |
|-----------------------------------------------------------------------------------------------------------------------------------------------------------------------------------------|-----------------------------------------------------------------------------------------------------------------------------------------|
| <b>Anemia</b> <input type="checkbox"/> Yes <input type="checkbox"/> No                                                                                                                  | <b>High Cholesterol</b> <input type="checkbox"/> Yes <input type="checkbox"/> No                                                        |
| <b>Arthritis</b> <input type="checkbox"/> *Yes <input type="checkbox"/> No If <b>*Yes*</b> , specify <input type="checkbox"/> Inflammatory<br><input type="checkbox"/> Non-inflammatory | <b>HIV/AIDS</b> <input type="checkbox"/> Yes <input type="checkbox"/> No                                                                |
| <b>Clotting Disorder</b> <input type="checkbox"/> Yes <input type="checkbox"/> No                                                                                                       | <b>Kidney Stones</b> <input type="checkbox"/> Yes <input type="checkbox"/> No                                                           |
| <b>Epilepsy</b> <input type="checkbox"/> Yes <input type="checkbox"/> No                                                                                                                | <b>Stroke</b> <input type="checkbox"/> Yes <input type="checkbox"/> No                                                                  |
| <b>Other Neurological Disease</b> <input type="checkbox"/> *Yes <input type="checkbox"/> No<br>If <b>*Yes*</b> , specify<br>_____                                                       | <b>Thyroid Disease</b> <input type="checkbox"/> Yes <input type="checkbox"/> No                                                         |
| <b>Do you have any environmental allergies?</b> <input type="checkbox"/> *Yes <input type="checkbox"/> No<br>If <b>*Yes*</b> , to what:<br>_____                                        | <b>Autoimmune Disease</b> <input type="checkbox"/> *Yes <input type="checkbox"/> No<br>If <b>*Yes*</b> , specify<br>_____               |
| <b>Do you have any medication allergies?</b> <input type="checkbox"/> *Yes <input type="checkbox"/> No<br>If <b>*Yes*</b> , to what:<br>_____                                           | <b>Do you have any food allergies?</b> <input type="checkbox"/> *Yes <input type="checkbox"/> No<br>If <b>*Yes*</b> , to what:<br>_____ |

**Please list any past surgeries you had:**

- |    |     |
|----|-----|
| 1. | 8.  |
| 2. | 9.  |
| 3. | 10. |
| 4. | 11. |
| 5. | 12. |
| 6. | 13. |
| 7. | 14. |

|              |              |              |              |
|--------------|--------------|--------------|--------------|
| CRF ENTRY    | CRF QC       | DB ENTRY     | DB QC        |
| Initial/date | Initial/date | Initial/date | Initial/date |

SUBJECT ID#: P126-S00-

**Presence of Any Current Symptoms**

|                           |                                                                                                                                        |                              |                                  |
|---------------------------|----------------------------------------------------------------------------------------------------------------------------------------|------------------------------|----------------------------------|
| <b>Symptoms</b>           | Symptoms of fever, cough, anorexia, myalgias, chills, shortness of breath, anosmia, sore throat, rhinorrhea, or diarrhea at enrollment | <input type="checkbox"/> Yes | <input type="checkbox"/> Ongoing |
|                           |                                                                                                                                        | <input type="checkbox"/> No  | <input type="checkbox"/> Unknown |
| <b>Fever</b>              | Presence of fever (T > 100.4 °F) on screening vital signs                                                                              | <input type="checkbox"/> Yes | <input type="checkbox"/> Ongoing |
|                           |                                                                                                                                        | <input type="checkbox"/> No  | <input type="checkbox"/> Unknown |
| <b>COVID-19 Diagnosis</b> | Known prior diagnosis with COVID-19                                                                                                    | <input type="checkbox"/> Yes | <input type="checkbox"/> Ongoing |
|                           |                                                                                                                                        | <input type="checkbox"/> No  | <input type="checkbox"/> Unknown |

|                                      |                    |
|--------------------------------------|--------------------|
| <b>Weight and Height Measurement</b> | <b>Vital Signs</b> |
|--------------------------------------|--------------------|

|                                                                                                                                                                                                                                                                                                                                                                                                                                                                                                                                                                                                                                     |                                                                                                                                                                                                                                                                                                                             |
|-------------------------------------------------------------------------------------------------------------------------------------------------------------------------------------------------------------------------------------------------------------------------------------------------------------------------------------------------------------------------------------------------------------------------------------------------------------------------------------------------------------------------------------------------------------------------------------------------------------------------------------|-----------------------------------------------------------------------------------------------------------------------------------------------------------------------------------------------------------------------------------------------------------------------------------------------------------------------------|
| Was weight assessed? <input type="checkbox"/> Yes <input type="checkbox"/> No<br>If No, reason not done: <input type="checkbox"/> Subject unable to comply <input type="checkbox"/> Investigator decision<br><input type="checkbox"/> Subject refusal <input type="checkbox"/> Other, specify: _____<br>Date assessed: ___ / ___ / ___ (dd/MMM/yyyy)<br><input type="checkbox"/> Pounds _____ lb OR<br><input type="checkbox"/> Kilograms _____ kg<br>Was height assessed? <input type="checkbox"/> Yes <input type="checkbox"/> No<br><input type="checkbox"/> Inches _____ in OR<br><input type="checkbox"/> Centimeters _____ cm | Respiratory Rate: ___ ___<br>O <sub>2</sub> Saturations: ___ ___<br>Any supplemental oxygen? <input type="checkbox"/> Yes <input type="checkbox"/> No<br>Temperature: ___ . ___ <input type="checkbox"/> °C <input type="checkbox"/> °F<br>Heart Rate: ___ ___ ___<br>Diastolic BP: ___ ___ ___<br>Systolic BP: ___ ___ ___ |
| <b>Body Mass Index (BMI)</b>                                                                                                                                                                                                                                                                                                                                                                                                                                                                                                                                                                                                        |                                                                                                                                                                                                                                                                                                                             |
| BMI: ___ ___                                                                                                                                                                                                                                                                                                                                                                                                                                                                                                                                                                                                                        |                                                                                                                                                                                                                                                                                                                             |

|              |              |              |              |
|--------------|--------------|--------------|--------------|
| CRF ENTRY    | CRF QC       | DB ENTRY     | DB QC        |
| Initial/date | Initial/date | Initial/date | Initial/date |

SUBJECT ID#: P126-S00-

**CURRENT MEDICATIONS LIST**

N/A

---

---

---

---

---

---

---

---

---

---

**PAST MEDICAL HISTORY**

N/A

---

---

---

---

---

---

---

---

---

---

**ELIGIBILITY**

Eligible to participate?  Yes  No

**SEROLOGY RESULTS**

IgG  Positive  Negative

IgM  Positive  Negative

**COMMENTS**

---

---

---

---

---

---

CRC Signature: \_\_\_\_\_

Date: \_\_\_\_\_

CRC Signature: \_\_\_\_\_

Date: \_\_\_\_\_

CRC Signature: \_\_\_\_\_

Date: \_\_\_\_\_

|              |              |              |              |
|--------------|--------------|--------------|--------------|
| CRF ENTRY    | CRF QC       | DB ENTRY     | DB QC        |
| Initial/date | Initial/date | Initial/date | Initial/date |
