# Supplementary material
Source: PubMed Central journal article supplement (PMC8191023)
Supplement: 12879_2021_6233_MOESM5_ESM.pdf [file 12879_2021_6233_MOESM5_ESM.pdf]

## PASS Study Monthly Clinic Visit Questions

SUBJECT ID#: P126-S00-  Visit Date: \_\_ / \_\_ / \_\_ Visit #: \_\_\_\_

**1. Since your last clinic visit, have you received a COVID-19 vaccination?**

\*Yes    No    *If \*Yes, please fill out a COVID-19 vaccination history form.*

**2. Since your last clinic visit, have you received any other vaccinations?**

\*Yes    No

If \*Yes, please specify:

| Vaccine Name | Vaccine Indication |
|--------------|--------------------|
|              |                    |
|              |                    |
|              |                    |
|              |                    |
|              |                    |
|              |                    |
|              |                    |

**3. Since your last clinic visit, have you enrolled in any other COVID-19 trial(s)?**

\*Yes    No    \*No, but plan to enroll soon (i.e. in the next one or two months)

If \*Yes or \*No, but plan to enroll soon, does it involve experimental vaccination or medication for COVID-19?

\*Yes    No

***If \*Yes, the participant may no longer be eligible to participate in the PASS study. Please review the current protocol eligibility criteria.***

**4. (A) If you are being seen monthly in clinic:**

Have you been filling out your symptoms questionnaires at least twice a month and your risk exposure/PPE/social distancing questionnaires once a month?

Yes    No    Not applicable

**(B) If you are being seen every three to six months in clinic:**

Have you been filling out your risk exposure/PPE/social distancing questionnaires once every three to six months?

Yes    No    Not applicable

|              |              |              |              |
|--------------|--------------|--------------|--------------|
| CRF ENTRY    | CRF QC       | DB ENTRY     | DB QC        |
| Initial/date | Initial/date | Initial/date | Initial/date |

## PASS Study Monthly Clinic Visit Questions

SUBJECT ID#: P126-S00-  Visit Date: \_\_ / \_\_ / \_\_ Visit #: \_\_\_\_

**5. Have you been tested for COVID-19 since your last clinic visit?**

\*Yes  No

If \*Yes, number of tests done: 1 2 3 4 5

| COVID-19 TEST #1 (complete for each test)                                                                                                |                                                                                                                                                                                                                                                                                                                                                                             |
|------------------------------------------------------------------------------------------------------------------------------------------|-----------------------------------------------------------------------------------------------------------------------------------------------------------------------------------------------------------------------------------------------------------------------------------------------------------------------------------------------------------------------------|
| Date of Test                                                                                                                             | __ / __ / __ (dd/MMM/yyyy)                                                                                                                                                                                                                                                                                                                                                  |
| Reason for Testing                                                                                                                       | <input type="checkbox"/> Symptoms <span style="margin-left: 200px;"><input type="checkbox"/> Travel</span><br><input type="checkbox"/> COVID-19 exposure <span style="margin-left: 100px;"><input type="checkbox"/> Pre-procedure (medical)</span><br><input type="checkbox"/> Screening test <span style="margin-left: 150px;"><input type="checkbox"/> Other _____</span> |
| Location of Testing                                                                                                                      | <input type="checkbox"/> WRNMMC COVID-19 outpatient testing facility<br><input type="checkbox"/> WRNMMC emergency department<br><input type="checkbox"/> Self-collected test<br><input type="checkbox"/> Other outpatient facility (name of site) _____<br><input type="checkbox"/> Other inpatient facility (name of site) _____                                           |
| Type of Test                                                                                                                             | <input type="checkbox"/> PCR <input type="checkbox"/> Antigen <input type="checkbox"/> Do not know                                                                                                                                                                                                                                                                          |
| COVID-19 Test Result                                                                                                                     | <input type="checkbox"/> Negative <input type="checkbox"/> *Positive  Did you have any symptoms?<br><input type="checkbox"/> *Yes <input type="checkbox"/> No                                                                                                                                                                                                               |
| <b>If the COVID-19 test was positive and you had symptoms, complete the next fields.</b>                                                 |                                                                                                                                                                                                                                                                                                                                                                             |
| How many days did your symptoms last (duration of symptoms)?<br>Please enter a number between 1 and 100 days: _____                      |                                                                                                                                                                                                                                                                                                                                                                             |
| Did you fill out a symptom questionnaire reflecting your most severe symptoms? <input type="checkbox"/> Yes <input type="checkbox"/> *No |                                                                                                                                                                                                                                                                                                                                                                             |
| <b>If *No, please fill out a paper questionnaire in clinic today.</b>                                                                    |                                                                                                                                                                                                                                                                                                                                                                             |
| Were you seen in an emergency department for COVID-19?                                                                                   | <input type="checkbox"/> *Yes <input type="checkbox"/> No                                                                                                                                                                                                                                                                                                                   |
| If *Yes<br>Name of site: _____                                                                                                           |                                                                                                                                                                                                                                                                                                                                                                             |
| Date of visit: __ / __ / __<br>(dd/MMM/yyyy)                                                                                             |                                                                                                                                                                                                                                                                                                                                                                             |
| Were you hospitalized for COVID-19?                                                                                                      | If *Yes                                                                                                                                                                                                                                                                                                                                                                     |
| <input type="checkbox"/> *Yes <input type="checkbox"/> No                                                                                | Name of hospital: _____                                                                                                                                                                                                                                                                                                                                                     |
| If *Yes, what was the hospitalization discharge diagnosis:<br>_____                                                                      | Date of hospital admission: __ / __ / __<br>(dd/MMM/yyyy)                                                                                                                                                                                                                                                                                                                   |
|                                                                                                                                          | Date of hospital discharge: __ / __ / __<br>(dd/MMM/yyyy)                                                                                                                                                                                                                                                                                                                   |
| <b>ENTRIES FOR ADDITIONAL TESTS ARE FOUND AT THE END OF THIS FORM</b>                                                                    |                                                                                                                                                                                                                                                                                                                                                                             |

| CRF ENTRY    | CRF QC       | DB ENTRY     | DB QC        |
|--------------|--------------|--------------|--------------|
| Initial/date | Initial/date | Initial/date | Initial/date |

## PASS Study Monthly Clinic Visit Questions

SUBJECT ID#: P126-S00-  Visit Date: \_\_ / \_\_ / \_\_ Visit #: \_\_\_\_\_

**6. Have you started any new medications since your last clinic visit?**

\*Yes  No

**If \*Yes, what are the names and indications of the medications?**

| Medication Name | Medication Indication |
|-----------------|-----------------------|
| 1.              |                       |
| 2.              |                       |
| 3.              |                       |
| 4.              |                       |
| 5.              |                       |

**7. Have you had any changes to your medical health since your last clinic visit?**

\*Yes  No

**If \*Yes, please describe the changes:**

---



---



---



---



---



---

**8. Other than you, how many people lived in your household this past month?**

Number of people: \_\_\_\_\_

**9. Other than you, how many people in your household have been vaccinated against COVID-19?**

Number of people: \_\_\_\_\_

|              |              |              |              |
|--------------|--------------|--------------|--------------|
| CRF ENTRY    | CRF QC       | DB ENTRY     | DB QC        |
| Initial/date | Initial/date | Initial/date | Initial/date |

### PASS Study Monthly Clinic Visit Questions

SUBJECT ID#: P126-S00-  Visit Date: \_\_ / \_\_ / \_\_ Visit #: \_\_\_\_\_

**10. Not including you, have any of your household members been diagnosed with COVID-19 since your last clinic visit?**

\*Yes  No

If \*Yes, please tell us the number of individuals who tested positive (other than you):

1  2  3  4  5  more than 5

**11. Saliva obtained today?**

Yes  \*No

If \*No, please specify reason: \_\_\_\_\_

Date Obtained: \_\_\_\_\_ Time Obtained: \_\_\_\_\_

CRC Initials \_\_\_\_\_

**12. Blood obtained today?**

Yes  \*No

If \*No, please specify reason: \_\_\_\_\_

Number of tubes obtained: \_\_\_\_\_

Date Obtained: \_\_\_\_\_ Time Obtained: \_\_\_\_\_

CRC Initials \_\_\_\_\_

| CRF ENTRY    | CRF QC       | DB ENTRY     | DB QC        |
|--------------|--------------|--------------|--------------|
| Initial/date | Initial/date | Initial/date | Initial/date |

## PASS Study Monthly Clinic Visit Questions

SUBJECT ID#: P126-S00-  Visit Date: \_\_\_ / \_\_\_ / \_\_\_ Visit #: \_\_\_

| COVID-19 TEST #2 (complete for each test)                                                                                                |                                                                                                                                      |
|------------------------------------------------------------------------------------------------------------------------------------------|--------------------------------------------------------------------------------------------------------------------------------------|
| Date of Test                                                                                                                             | ___ / ___ / ___ (dd/MMM/yyyy)                                                                                                        |
| Reason for Testing                                                                                                                       | <input type="checkbox"/> Symptoms <span style="margin-left: 200px;"><input type="checkbox"/> Travel</span>                           |
|                                                                                                                                          | <input type="checkbox"/> COVID-19 exposure <span style="margin-left: 100px;"><input type="checkbox"/> Pre-procedure (medical)</span> |
|                                                                                                                                          | <input type="checkbox"/> Screening test <span style="margin-left: 100px;"><input type="checkbox"/> Other _____</span>                |
|                                                                                                                                          | <input type="checkbox"/> Other _____                                                                                                 |
| Location of Testing                                                                                                                      | <input type="checkbox"/> WRNMMC COVID-19 outpatient testing facility                                                                 |
|                                                                                                                                          | <input type="checkbox"/> WRNMMC emergency department                                                                                 |
|                                                                                                                                          | <input type="checkbox"/> Self-collected test                                                                                         |
|                                                                                                                                          | <input type="checkbox"/> Other outpatient facility (name of site) _____                                                              |
|                                                                                                                                          | <input type="checkbox"/> Other inpatient facility (name of site) _____                                                               |
|                                                                                                                                          | <input type="checkbox"/> Other _____                                                                                                 |
| Type of Test                                                                                                                             | <input type="checkbox"/> PCR <input type="checkbox"/> Antigen <input type="checkbox"/> Do not know                                   |
| COVID-19 Test Result                                                                                                                     | <input type="checkbox"/> Negative <input type="checkbox"/> *Positive                                                                 |
| Did you have any symptoms?                                                                                                               | <input type="checkbox"/> *Yes <input type="checkbox"/> No                                                                            |
| <b>If the COVID-19 test was positive and you had symptoms, complete the next fields.</b>                                                 |                                                                                                                                      |
| How many days did your symptoms last (duration of symptoms)?<br>Please enter a number between 1 and 100 days: _____                      |                                                                                                                                      |
| Did you fill out a symptom questionnaire reflecting your most severe symptoms? <input type="checkbox"/> Yes <input type="checkbox"/> *No |                                                                                                                                      |
| <b>If *No, please fill out a paper questionnaire in clinic today.</b>                                                                    |                                                                                                                                      |
| Were you seen in an emergency department for COVID-19? <input type="checkbox"/> *Yes <input type="checkbox"/> No                         |                                                                                                                                      |
| If *Yes<br>Name of site: _____                                                                                                           |                                                                                                                                      |
| Date of visit: ___ / ___ / ___<br><small>(dd/MMM/yyyy)</small>                                                                           |                                                                                                                                      |
| If *Yes<br>Name of hospital: _____                                                                                                       |                                                                                                                                      |
| Date of hospital admission: ___ / ___ / ___<br><small>(dd/MMM/yyyy)</small>                                                              |                                                                                                                                      |
| Date of hospital discharge: ___ / ___ / ___<br><small>(dd/MMM/yyyy)</small>                                                              |                                                                                                                                      |
| <b>ENTRIES FOR ADDITIONAL TESTS ARE FOUND AT THE END OF THIS FORM</b>                                                                    |                                                                                                                                      |

| CRF ENTRY    | CRF QC       | DB ENTRY     | DB QC        |
|--------------|--------------|--------------|--------------|
| Initial/date | Initial/date | Initial/date | Initial/date |

## PASS Study Monthly Clinic Visit Questions

SUBJECT ID#: P126-S00-  Visit Date: \_\_ / \_\_ / \_\_ Visit #: \_\_\_\_

| COVID-19 TEST #3 (complete for each test)                                                                                                |                                                                                                                                                                                                                                                                                                                                                                             |
|------------------------------------------------------------------------------------------------------------------------------------------|-----------------------------------------------------------------------------------------------------------------------------------------------------------------------------------------------------------------------------------------------------------------------------------------------------------------------------------------------------------------------------|
| Date of Test                                                                                                                             | ___ / ___ / ___ (dd/MMM/yyyy)                                                                                                                                                                                                                                                                                                                                               |
| Reason for Testing                                                                                                                       | <input type="checkbox"/> Symptoms <span style="margin-left: 200px;"><input type="checkbox"/> Travel</span><br><input type="checkbox"/> COVID-19 exposure <span style="margin-left: 100px;"><input type="checkbox"/> Pre-procedure (medical)</span><br><input type="checkbox"/> Screening test <span style="margin-left: 100px;"><input type="checkbox"/> Other _____</span> |
| Location of Testing                                                                                                                      | <input type="checkbox"/> WRNMMC COVID-19 outpatient testing facility<br><input type="checkbox"/> WRNMMC emergency department<br><input type="checkbox"/> Self-collected test<br><input type="checkbox"/> Other outpatient facility (name of site) _____<br><input type="checkbox"/> Other inpatient facility (name of site) _____                                           |
| Type of Test                                                                                                                             | <input type="checkbox"/> PCR <input type="checkbox"/> Antigen <input type="checkbox"/> Do not know<br>COVID-19 Test Result  Did you have any symptoms?<br><input type="checkbox"/> Negative <input type="checkbox"/> *Positive <input type="checkbox"/> *Yes <input type="checkbox"/> No                                                                                    |
| <b>If the COVID-19 test was positive and you had symptoms, complete the next fields.</b>                                                 |                                                                                                                                                                                                                                                                                                                                                                             |
| How many days did your symptoms last (duration of symptoms)?<br>Please enter a number between 1 and 100 days: _____                      |                                                                                                                                                                                                                                                                                                                                                                             |
| Did you fill out a symptom questionnaire reflecting your most severe symptoms? <input type="checkbox"/> Yes <input type="checkbox"/> *No |                                                                                                                                                                                                                                                                                                                                                                             |
| <b>If *No, please fill out a paper questionnaire in clinic today.</b>                                                                    |                                                                                                                                                                                                                                                                                                                                                                             |
| Were you seen in an emergency department for COVID-19?                                                                                   | <input type="checkbox"/> *Yes <input type="checkbox"/> No                                                                                                                                                                                                                                                                                                                   |
| If *Yes<br>Name of site: _____                                                                                                           |                                                                                                                                                                                                                                                                                                                                                                             |
| Date of visit: ___ / ___ / ___<br><small>(dd/MMM/yyyy)</small>                                                                           |                                                                                                                                                                                                                                                                                                                                                                             |
| Were you hospitalized for COVID-19?                                                                                                      | If *Yes<br>Name of hospital: _____                                                                                                                                                                                                                                                                                                                                          |
| <input type="checkbox"/> *Yes <input type="checkbox"/> No                                                                                |                                                                                                                                                                                                                                                                                                                                                                             |
| If *Yes, what was the hospitalization discharge diagnosis:<br><br>_____                                                                  | Date of hospital admission: ___ / ___ / ___<br><small>(dd/MMM/yyyy)</small>                                                                                                                                                                                                                                                                                                 |
|                                                                                                                                          | Date of hospital discharge: ___ / ___ / ___<br><small>(dd/MMM/yyyy)</small>                                                                                                                                                                                                                                                                                                 |
| <b>ENTRIES FOR ADDITIONAL TESTS ARE FOUND AT THE END OF THIS FORM</b>                                                                    |                                                                                                                                                                                                                                                                                                                                                                             |

| CRF ENTRY    | CRF QC       | DB ENTRY     | DB QC        |
|--------------|--------------|--------------|--------------|
| Initial/date | Initial/date | Initial/date | Initial/date |

## PASS Study Monthly Clinic Visit Questions

SUBJECT ID#: P126-S00-  Visit Date: \_\_ / \_\_ / \_\_ Visit #: \_\_\_\_

| COVID-19 TEST #4 (complete for each test)                                                                                                |                                                                                                                                                                                                                                                                                                                                                                             |
|------------------------------------------------------------------------------------------------------------------------------------------|-----------------------------------------------------------------------------------------------------------------------------------------------------------------------------------------------------------------------------------------------------------------------------------------------------------------------------------------------------------------------------|
| Date of Test                                                                                                                             | ___ / ___ / ___ (dd/MMM/yyyy)                                                                                                                                                                                                                                                                                                                                               |
| Reason for Testing                                                                                                                       | <input type="checkbox"/> Symptoms <span style="margin-left: 200px;"><input type="checkbox"/> Travel</span><br><input type="checkbox"/> COVID-19 exposure <span style="margin-left: 100px;"><input type="checkbox"/> Pre-procedure (medical)</span><br><input type="checkbox"/> Screening test <span style="margin-left: 150px;"><input type="checkbox"/> Other _____</span> |
| Location of Testing                                                                                                                      | <input type="checkbox"/> WRNMMC COVID-19 outpatient testing facility<br><input type="checkbox"/> WRNMMC emergency department<br><input type="checkbox"/> Self-collected test<br><input type="checkbox"/> Other outpatient facility (name of site) _____<br><input type="checkbox"/> Other inpatient facility (name of site) _____                                           |
| Type of Test                                                                                                                             | <input type="checkbox"/> PCR <input type="checkbox"/> Antigen <input type="checkbox"/> Do not know<br>COVID-19 Test Result  Did you have any symptoms?<br><input type="checkbox"/> Negative <input type="checkbox"/> *Positive <input type="checkbox"/> *Yes <input type="checkbox"/> No                                                                                    |
| <b>If the COVID-19 test was positive and you had symptoms, complete the next fields.</b>                                                 |                                                                                                                                                                                                                                                                                                                                                                             |
| How many days did your symptoms last (duration of symptoms)?<br>Please enter a number between 1 and 100 days: _____                      |                                                                                                                                                                                                                                                                                                                                                                             |
| Did you fill out a symptom questionnaire reflecting your most severe symptoms? <input type="checkbox"/> Yes <input type="checkbox"/> *No |                                                                                                                                                                                                                                                                                                                                                                             |
| <b>If *No, please fill out a paper questionnaire in clinic today.</b>                                                                    |                                                                                                                                                                                                                                                                                                                                                                             |
| Were you seen in an emergency department for COVID-19?                                                                                   | <input type="checkbox"/> *Yes <input type="checkbox"/> No                                                                                                                                                                                                                                                                                                                   |
| If *Yes<br>Name of site: _____                                                                                                           |                                                                                                                                                                                                                                                                                                                                                                             |
| Date of visit: ___ / ___ / ___<br><small>(dd/MMM/yyyy)</small>                                                                           |                                                                                                                                                                                                                                                                                                                                                                             |
| Were you hospitalized for COVID-19?                                                                                                      | If *Yes                                                                                                                                                                                                                                                                                                                                                                     |
| <input type="checkbox"/> *Yes <input type="checkbox"/> No                                                                                | Name of hospital: _____                                                                                                                                                                                                                                                                                                                                                     |
| If *Yes, what was the hospitalization discharge diagnosis:<br><br>_____                                                                  | Date of hospital admission: ___ / ___ / ___<br><small>(dd/MMM/yyyy)</small>                                                                                                                                                                                                                                                                                                 |
|                                                                                                                                          | Date of hospital discharge: ___ / ___ / ___<br><small>(dd/MMM/yyyy)</small>                                                                                                                                                                                                                                                                                                 |
| <b>ENTRIES FOR ADDITIONAL TESTS ARE FOUND AT THE END OF THIS FORM</b>                                                                    |                                                                                                                                                                                                                                                                                                                                                                             |

| CRF ENTRY    | CRF QC       | DB ENTRY     | DB QC        |
|--------------|--------------|--------------|--------------|
| Initial/date | Initial/date | Initial/date | Initial/date |

## PASS Study Monthly Clinic Visit Questions

SUBJECT ID#: P126-S00-  Visit Date: \_\_ / \_\_ / \_\_ Visit #: \_\_\_\_

| COVID-19 TEST #5 (complete for each test)                                                                                                |                                                                                                                                      |
|------------------------------------------------------------------------------------------------------------------------------------------|--------------------------------------------------------------------------------------------------------------------------------------|
| Date of Test                                                                                                                             | __ / __ / __ (dd/MMM/yyyy)                                                                                                           |
| Reason for Testing                                                                                                                       | <input type="checkbox"/> Symptoms <span style="margin-left: 200px;"><input type="checkbox"/> Travel</span>                           |
|                                                                                                                                          | <input type="checkbox"/> COVID-19 exposure <span style="margin-left: 150px;"><input type="checkbox"/> Pre-procedure (medical)</span> |
|                                                                                                                                          | <input type="checkbox"/> Screening test <span style="margin-left: 150px;"><input type="checkbox"/> Other _____</span>                |
|                                                                                                                                          | <input type="checkbox"/> Other _____                                                                                                 |
| Location of Testing                                                                                                                      | <input type="checkbox"/> WRNMMC COVID-19 outpatient testing facility                                                                 |
|                                                                                                                                          | <input type="checkbox"/> WRNMMC emergency department                                                                                 |
|                                                                                                                                          | <input type="checkbox"/> Self-collected test                                                                                         |
|                                                                                                                                          | <input type="checkbox"/> Other outpatient facility (name of site) _____                                                              |
|                                                                                                                                          | <input type="checkbox"/> Other inpatient facility (name of site) _____                                                               |
|                                                                                                                                          | <input type="checkbox"/> Other _____                                                                                                 |
| Type of Test                                                                                                                             | <input type="checkbox"/> PCR <input type="checkbox"/> Antigen <input type="checkbox"/> Do not know                                   |
| COVID-19 Test Result                                                                                                                     | <input type="checkbox"/> Negative <input type="checkbox"/> *Positive                                                                 |
| Did you have any symptoms?                                                                                                               | <input type="checkbox"/> *Yes <input type="checkbox"/> No                                                                            |
| <b>If the COVID-19 test was positive and you had symptoms, complete the next fields.</b>                                                 |                                                                                                                                      |
| How many days did your symptoms last (duration of symptoms)?<br>Please enter a number between 1 and 100 days: _____                      |                                                                                                                                      |
| Did you fill out a symptom questionnaire reflecting your most severe symptoms? <input type="checkbox"/> Yes <input type="checkbox"/> *No |                                                                                                                                      |
| <b>If *No, please fill out a paper questionnaire in clinic today.</b>                                                                    |                                                                                                                                      |
| Were you seen in an emergency department for COVID-19? <input type="checkbox"/> *Yes <input type="checkbox"/> No                         |                                                                                                                                      |
| If *Yes<br>Name of site: _____                                                                                                           |                                                                                                                                      |
| Date of visit: __ / __ / __ (dd/MMM/yyyy)                                                                                                |                                                                                                                                      |
| Were you hospitalized for COVID-19? <input type="checkbox"/> *Yes <input type="checkbox"/> No                                            |                                                                                                                                      |
| If *Yes<br>Name of hospital: _____                                                                                                       |                                                                                                                                      |
| Date of hospital admission: __ / __ / __ (dd/MMM/yyyy)                                                                                   |                                                                                                                                      |
| Date of hospital discharge: __ / __ / __ (dd/MMM/yyyy)                                                                                   |                                                                                                                                      |
| <b>ENTRIES FOR ADDITIONAL TESTS ARE FOUND AT THE END OF THIS FORM</b>                                                                    |                                                                                                                                      |

| CRF ENTRY    | CRF QC       | DB ENTRY     | DB QC        |
|--------------|--------------|--------------|--------------|
| Initial/date | Initial/date | Initial/date | Initial/date |
