# Supplementary material
Source: PubMed Central journal article supplement (PMC8191023)
Supplement: 12879_2021_6233_MOESM9_ESM.pdf [file 12879_2021_6233_MOESM9_ESM.pdf]

### COVID-19 VACCINATION HISTORY FORM

SUBJECT ID#: P126-S00-  Visit Date: \_\_ \_\_ / \_\_ \_\_ \_\_ / \_\_ \_\_ \_\_ \_\_ Visit #: \_\_\_\_\_

This form will be filled out either while at the CTC clinic or will be sent to the study subjects electronically at clinic visits when a subject reports having received a COVID-19 vaccine (after both first dose and booster).

1. What date did you receive your COVID-19 vaccine?

Date: \_\_ \_\_ / \_\_ \_\_ \_\_ / \_\_ \_\_ \_\_ \_\_ (dd/MMM/yyyy)

2. Was this the first or second vaccination with this vaccine?

1st

2nd

3. What company manufactured the vaccine?

Pfizer/BioNTech

Moderna

Oxford/AztraZeneca

Novavax

Johnson and Johnson

do not know

other \_\_\_\_\_

4. Where did you receive your vaccine?

WRNMMC

other facility \_\_\_\_\_

| CRF ENTRY    | CRF QC       | DB ENTRY     | DB QC        |
|--------------|--------------|--------------|--------------|
| Initial/date | Initial/date | Initial/date | Initial/date |

**COVID-19 VACCINATION HISTORY FORM**

SUBJECT ID#: P126-S00-  Visit Date: \_\_ \_\_ / \_\_ \_\_ \_\_ / \_\_ \_\_ \_\_ \_\_ Visit #: \_\_\_\_\_

5. Please rate the extent to which you had any of the following symptoms after vaccination.

|                                                      | <b>Not at all</b>        | <b>A little bit</b>      | <b>Somewhat</b>          | <b>Quite a bit</b>       | <b>Very much</b>         |
|------------------------------------------------------|--------------------------|--------------------------|--------------------------|--------------------------|--------------------------|
| POINTS                                               | 0                        | 1                        | 2                        | 3                        | 4                        |
| Pain at injection site                               | <input type="checkbox"/> | <input type="checkbox"/> | <input type="checkbox"/> | <input type="checkbox"/> | <input type="checkbox"/> |
| Soreness at injection site                           | <input type="checkbox"/> | <input type="checkbox"/> | <input type="checkbox"/> | <input type="checkbox"/> | <input type="checkbox"/> |
| Redness at injection site                            | <input type="checkbox"/> | <input type="checkbox"/> | <input type="checkbox"/> | <input type="checkbox"/> | <input type="checkbox"/> |
| Weak or tired                                        | <input type="checkbox"/> | <input type="checkbox"/> | <input type="checkbox"/> | <input type="checkbox"/> | <input type="checkbox"/> |
| Headache                                             | <input type="checkbox"/> | <input type="checkbox"/> | <input type="checkbox"/> | <input type="checkbox"/> | <input type="checkbox"/> |
| Body aches or pains                                  | <input type="checkbox"/> | <input type="checkbox"/> | <input type="checkbox"/> | <input type="checkbox"/> | <input type="checkbox"/> |
| Felt hot                                             | <input type="checkbox"/> | <input type="checkbox"/> | <input type="checkbox"/> | <input type="checkbox"/> | <input type="checkbox"/> |
| Felt cold                                            | <input type="checkbox"/> | <input type="checkbox"/> | <input type="checkbox"/> | <input type="checkbox"/> | <input type="checkbox"/> |
| Chills or shivering                                  | <input type="checkbox"/> | <input type="checkbox"/> | <input type="checkbox"/> | <input type="checkbox"/> | <input type="checkbox"/> |
| Joint pains                                          | <input type="checkbox"/> | <input type="checkbox"/> | <input type="checkbox"/> | <input type="checkbox"/> | <input type="checkbox"/> |
| Felt nauseous<br>(feeling like you want to throw up) | <input type="checkbox"/> | <input type="checkbox"/> | <input type="checkbox"/> | <input type="checkbox"/> | <input type="checkbox"/> |
| Swollen lymph nodes                                  | <input type="checkbox"/> | <input type="checkbox"/> | <input type="checkbox"/> | <input type="checkbox"/> | <input type="checkbox"/> |

|              |              |              |              |
|--------------|--------------|--------------|--------------|
| CRF ENTRY    | CRF QC       | DB ENTRY     | DB QC        |
| Initial/date | Initial/date | Initial/date | Initial/date |

**COVID-19 VACCINATION HISTORY FORM**

---

SUBJECT ID#: P126-S00-  Visit Date: \_\_ \_\_ / \_\_ \_\_ \_\_ / \_\_ \_\_ \_\_ \_\_ Visit #: \_\_\_\_\_

6. For how many days did you have symptoms?

0 (no symptoms)

1    2    3    4    5    6    7    8    9    10    more than 10 days

7. Did you track these symptoms on the PASS study symptoms questionnaire?

Yes    No

| CRF ENTRY    | CRF QC       | DB ENTRY     | DB QC        |
|--------------|--------------|--------------|--------------|
| Initial/date | Initial/date | Initial/date | Initial/date |
